# Supplementary material for: The associations between emotional empathy, emotional intelligence, and COVID-19-related stress among nursing students: a cross-sectional study
Source: PubMed Central journal article supplement — BMC Med Educ. 2024 Dec 18;24:1484. doi: 10.1186/s12909-024-06474-z (PMC11656547; doi:10.1186/s12909-024-06474-z), 2024-12-18
Supplement: 12909_2024_6474_MOESM1_ESM.pdf [file 12909_2024_6474_MOESM1_ESM.pdf]

**[General Information Questionnaire]**

1. Age \_\_\_\_\_ years
2. Gender  Male  Female
3. Residence status  Urban  Rural  Suburb
4. Grade  Freshman  Sophomore  Junior
5. Willingness to choose nursing upon admission  Voluntary choice  Influenced by others  
 Others (favorable job prospects, transfer, etc.)
6. Whether to engage in nursing after graduation  Yes  No  Uncertain
